# Supplementary material
Source: MDPI journal article supplement (https://www.mdpi.com/search?q=ijms-20-04176)
Supplement: s001 [file ijms-20-04176-s001.pdf]

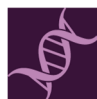

Intragenic mutations of FOXP1-related encephalopathy reported in the literature.

| <b>Genetic mutations (amino acid change )</b>                 | <b>FOXP1 domain</b> | <b>Coding effect</b> | <b>References</b> |
|---------------------------------------------------------------|---------------------|----------------------|-------------------|
| c.133_469del337insACCCACCGCCCC ACCCACCGCCCC (p.Pro45Thrfs*39) | N-terminal          | Frameshift           | [1,2]             |
| c.136C>T (p.Gln46Ter)                                         | N-terminal          | Nonsense             | [3]               |
| c.201_224del24 (p.Pro66_Gln73del)                             | N-terminal          | Frameshift           | [4]               |
| c.214C>T (p.Gln72Ter)                                         | N-terminal          | Nonsense             | [5]               |
| p.Gln73dup                                                    | N-terminal          | In-frame             | [6]               |
| c.222_223dupGC (p.Pro75Argfs*118)                             | N-terminal          | Frameshift           | [1]               |
| c.256dupC (p.Gln86Profs*34)                                   | N-terminal          | Frameshift           | [7,8]             |
| p.Gln86Profs*35                                               | N-terminal          | Frameshift           | [6]               |
| c.256delC (p.Gln86Argfs*106)                                  | N-terminal          | Frameshift           | [8,9]             |
| c.256C>T (p.Gln86Ter)                                         | N-terminal          | Nonsense             | [1,5,10]          |
| c.263_278del16 (p.Arg88Profs*99)                              | N-terminal          | Frameshift           | [10,11]           |
| c.292_295delGGCC (p.Gly98Profs*93)                            | N-terminal          | Frameshift           | [4]               |
| c.298del (p.Gln100Serfs*92)                                   | N-terminal          | Frameshift           | [12]              |
| c.385delG (p. Glu129Serfs*63)                                 | N-terminal          | Frameshift           | [5]               |
| c.392delG (p.Gly131Alafs*60)                                  | N-terminal          | Frameshift           | [13]              |
| c.406G>T (p.Glu136Ter)                                        | N-terminal          | Nonsense             | [5]               |
| p.Glu136Glyfs*39                                              | N-terminal          | Frameshift           | [6]               |
| c.430G>T (p.Glu144Ter )                                       | N-terminal          | Nonsense             | [1]               |
| c.460G>T (p.Glu154Ter)                                        | N-terminal          | Nonsense             | [14]              |
| c.460delG (p.Glu154Argfs*38)                                  | N-terminal          | Frameshift           | [5]               |
| c.460dupG (p.Glu154Glyfs*301)                                 | N-terminal          | Frameshift           | [5,10,11,15]      |
| c.461insG (p.Glu155Glyfs*300)                                 | N-terminal          | Frameshift           | [4,6]             |
| p.Glu155Ter                                                   | N-terminal          | Nonsense             | [6]               |
| p.Lys162Serfs*51                                              | N-terminal          | Frameshift           | [6]               |
| c.505_506delGGinsT(p.Gly168Serfs*23)                          | N-terminal          | Frameshift           | [10]              |
| c.506delG (p.Gly169Alafs*23)                                  | N-terminal          | Frameshift           | [1]               |
| c.506dup (p.Lys170Glnfs*285)                                  | N-terminal          | Frameshift           | [16]              |

|                                     |             |            |           |
|-------------------------------------|-------------|------------|-----------|
| c.515_577del63 (p.Gly172_Met192del) | N-terminal  | In-frame   | [1,15,17] |
| c.517G>T (p.Glu173Ter)              | N-terminal  | Nonsense   | [5]       |
| c.537C>G (p.Tyr179Ter)              | N-terminal  | Nonsense   | [6]       |
| c.541A>G (p.Lys181Glu)              | forkhead cs | Missense   | [4]       |
| c.543G>C (p.Lys181Asn)              | forkhead cs | Missense   | [5]       |
| p.Pro182Leu                         | forkhead cs | Missense   | [6]       |
| c.545C>A (p.Pro182Gln)              | forkhead cs | Missense   | [5]       |
| c.552dupC (p.Ser185Glnfs*270)       | forkhead cs | Frameshift | [6,18]    |
| c.553A>T (p.Ser185Cys)              | forkhead cs | Missense   | [5]       |
| c.559A>G (p.Asn187Asp)              | forkhead cs | Missense   | [6,19]    |
| c.561C>A (p.Asn187Lys)              | forkhead cs | Missense   | [5,6]     |
| c.565C>T (p.Leu189Phe)              | forkhead cs | Missense   | [5]       |
| c.565C>G (p.Leu189Val)              | forkhead cs | Missense   | [20]      |
| c.569T>A (p. Ile190Asn)             | forkhead cs | Missense   | [21]      |
| c.572T>G (p.Met191Arg)              | forkhead cs | Missense   | [11,15]   |
| c.577G>A (p.Ala193Thr)              | forkhead cs | Missense   | [1,22]    |
| p.Ile194Serfs*19                    | forkhead cs | Frameshift | [6]       |
| c.581T>G (p.Ile194Ser)              | forkhead cs | Missense   | [5]       |
| p.Arg195Pro                         | forkhead    | Missense   | [6]       |
| c.586C>T (p.Gln196Ter)              | forkhead    | Nonsense   | [1,6]     |
| c.590G>T (p.Ser197Ile)              | forkhead    | Missense   | [5]       |
| c.592_594delCCC (p.Prp198del)       | forkhead    | In-frame   | [5]       |
| c.609_616del (p.L204Hfs*248)        | forkhead    | Frameshift | [14]      |
| c.610C>T (p.Leu204Phe)              | forkhead    | Missense   | [6,23]    |
| c.619A>T (p.Ile207Phe)              | Forkhead    | Missense   | [4]       |
| c.624C>G (p.Tyr208Ter)              | forkhead    | Nonsense   | [4,5,18]  |
| p.Tyr208_Ile211del                  | forkhead    | In-frame   | [6]       |
| c.643T>C (p.Phe215Leu)              | forkhead    | Nonsense   | [18]      |
| c.651C>G (p.Tyr217Ter)              | forkhead    | Nonsense   | [1]       |
| c.653A>C (p.Tyr218Ser)              | forkhead    | Missense   | [4]       |
| p.Gly224Ser                         | forkhead    | Missense   | [6]       |

|                                      |            |            |        |
|--------------------------------------|------------|------------|--------|
| c.681C > G (p.Asn227Lys)             | forkhead   | Missense   | [18]   |
| c.688C>G (p.Arg230Gly)               | forkhead   | Missense   | [4]    |
| c.689G>A (p.Arg230His)               | forkhead   | Missense   | [6,24] |
| c.693C>A (p.Hys231Gln)               | forkhead   | Missense   | [4]    |
| c.694A>T (p.Asn232Tyr)               | forkhead   | Missense   | [25]   |
| c.695A>G (p.Asn232Ser)               | forkhead   | Missense   | [11]   |
| c.700T>C (p.Ser234Pro)               | forkhead   | Missense   | [10]   |
| p.Val242Cysfs*84                     | forkhead   | Frameshift | [6]    |
| c.730C>T (p.Arg244Cys)               | forkhead   | Missense   | [26]   |
| c.732_741del10 (p.His245Thrfs*78)    | forkhead   | Frameshift | [5]    |
| c.735delC (p.Tyr246Thrfs*80)         | forkhead   | Frameshift | [1]    |
| c.755G>T (p.Gly252Val)               | forkhead   | Missense   | [1,6]  |
| c.755G>A (p.Gly252Asp)               | forkhead   | Missense   | [5]    |
| c.757A>G (p.Asn253Asp)               | forkhead   | Missense   | [10]   |
| c.762C>G (p.Tyr254Ter)               | forkhead   | Nonsense   | [1]    |
| p.Tyr254Thrfs*72                     | forkhead   | Frameshift | [6]    |
| c.763T>C (p.Trp255Arg)               | forkhead   | Missense   | [6,8]  |
| c.765G>A (p.Trp255Ter)               | forkhead   | Missense   | [27]   |
| p.Leu257Pro                          | forkhead   | Missense   | [6]    |
| c.775C>T (p.Pro259Ser)               | forkhead   | Missense   | [25]   |
| c.788_792delACGTG(p.Asp263Valfs*190) | forkhead   | Frameshift | [28]   |
| p.Ile266Tyrfs*189                    | forkhead   | Frameshift | [6]    |
| c.858dupC (p.Lys287Glnfs*168)        | C-terminal | Frameshift | [29]   |
| c.893C>A (p.Thr298Asn)               | C-terminal | Missense   | [25]   |
| c.921C>G (p.Try307Ter)               | C-terminal | Nonsense   | [5]    |
| c.924G>A (p.Trp308Ter)               | GBD        | Nonsense   | [2]    |
| c.946delC (p.Leu316Cysfs*10)         | GBD        | Frameshift | [11]   |
| c.953_954insC (p.Arg320Profs*135)    | C-terminal | Frameshift | [4]    |
| c.969delC (p.Ser323Argfs*3)          | C-terminal | Frameshift | [27]   |
| c.974dupT (p.Leu325Phefs*130)        | C-terminal | Frameshift | [5]    |
| c.974_975insA (p.Ser326Glufs*129)    | C-terminal | Frameshift | [6,30] |

|                                      |            |            |      |
|--------------------------------------|------------|------------|------|
| c.981C>A (p.Tyr327Ter)               | C-terminal | Nonsense   | [11] |
| c.1082dup (p.Leu362Profs*93)         | C-terminal | Frameshift | [5]  |
| c.1117_1118insCGTA(p.Ala375Valfs*81) | C-terminal | Frameshift | [4]  |
| c.1141delG (p.Ala381Profs*4)         | C-terminal | Frameshift | [5]  |
| c.1186C>A, (p.Cys396Ter)             | JBD        | Nonsense   | [11] |
| c.1200C>A (p.Tyr400Ter)              | JBD        | Nonsense   | [3]  |
| c.1200C>G (p.Tyr400Ter)              | JBD        | Nonsense   | [2]  |
| p.Asn408Ile                          | C-terminal | Missense   | [6]  |
| c.1248C>G (p.Tyr416Ter)              | C-terminal | Missense   | [14] |
| c.1470A>C (p.Ter490Tyext*21)         | C-terminal | Stop loss  | [4]  |

<sup>1</sup> Table S1 shows the published *FOXG1* variants.

## References

- Seltzer, L.E.; Ma, M.; Ahmed, S.; Bertrand, M.; Dobyns, W.B.; Wheless, J.; Paciorkowski, A.R. Epilepsy and outcome in *FOXG1*-related disorders. *Epilepsia* **2014**, *55*, 1292–1300, doi:10.1111/epi.12648.
- Philippe, C.; Amsallem, D.; Francannet, C.; Lambert, L.; Saunier, A.; Verneau, F.; Jonveaux, P. Phenotypic variability in Rett syndrome associated with *FOXG1* mutations in females. *J. Med. Genet.* **2010**, *47*, 59–65, doi:10.1136/jmg.2009.067355.
- De Filippis, R.; Pancrazi, L.; Bjørge, K.; Rosseto, A.; Kleefstra, T.; Grillo, E.; Panighini, A.; Cardarelli, F.; Meloni, I.; Ariani, F., et al. *Expanding the phenotype associated with FOXG1 mutations and in vivo FoxG1 chromatin-binding dynamics*; 2011; Vol. 82, pp. 395-403.
- Vidal, S.; Brandi, N.; Pacheco, P.; Gerotina, E.; Blasco, L.; Trotta, J.R.; Derdak, S.; Del Mar O'Callaghan, M.; Garcia-Cazorla, A.; Pineda, M., et al. The utility of Next Generation Sequencing for molecular diagnostics in Rett syndrome. *Sci. Rep.* **2017**, *7*, 12288, doi:10.1038/s41598-017-11620-3.
- Mitter, D.; Pringsheim, M.; Kaulisch, M.; Plumacher, K.S.; Schroder, S.; Warthemann, R.; Abou Jamra, R.; Baethmann, M.; Bast, T.; Buttel, H.M., et al. *FOXG1 syndrome: genotype-phenotype association in 83 patients with FOXG1 variants*. *Genet. Med.* **2017**, 10.1038/gim.2017.75, doi:10.1038/gim.2017.75.
- Vegas, N.; Cavallin, M.; Maillard, C.; Boddaert, N.; Toulouse, J.; Schaefer, E.; Lerman-Sagie, T.; Lev, D.; Magalie, B.; Moutton, S., et al. Delineating *FOXG1* syndrome: From congenital microcephaly to hyperkinetic encephalopathy. *Neurology. Genet.* **2018**, *4*, e281, doi:10.1212/nxg.0000000000000281.
- Le Guen, T.; Bahi-Buisson, N.; Nectoux, J.; Boddaert, N.; Fichou, Y.; Diebold, B.; Desguerre, I.; Raqbi, F.; Daire, V.C.; Chelly, J., et al. A *FOXG1* mutation in a boy with congenital variant of Rett syndrome. *Neurogenetics* **2011**, *12*, 1–8, doi:10.1007/s10048-010-0255-4.
- Wong, L.-C.; Wu, Y.-T.; Hsu, C.-J.; Weng, W.-C.; Tsai, W.-C.; Lee, W.-T. Cognition and Evolution of Movement Disorders of *FOXG1*-Related Syndrome. *Front. Neurol.* **2019**, *10*, doi:10.3389/fneur.2019.00641.
- Allou, L.; Lambert, L.; Amsallem, D.; Bieth, E.; Edery, P.; Destree, A.; Rivier, F.; Amor, D.; Thompson, E.; Nicholl, J., et al. 14q12 and severe Rett-like phenotypes: new clinical insights and physical mapping of *FOXG1*-regulatory elements. *Eur. J. Hum. Genet.* **2012**, *20*, 1216–1223, doi:10.1038/ejhg.2012.127.

10. Kortüm, F.; Das, S.; Flindt, M.; Morris-Rosendahl, D.J.; Stefanova, I.; Goldstein, A.; Horn, D.; Klopocki, E.; Kluger, G.; Martin, P. The core FOXP1 syndrome phenotype consists of postnatal microcephaly, severe mental retardation, absent language, dyskinesia, and corpus callosum hypogenesis. *J. Med. Genet.* **2011**, jmg. 2010.087528.
11. Papandreou, A.; Schneider, R.B.; Augustine, E.F.; Ng, J.; Mankad, K.; Meyer, E.; McTague, A.; Ngoh, A.; Hemingway, C.; Robinson, R., et al. Delineation of the movement disorders associated with FOXP1 mutations. *Neurology* **2016**, *86*, 1794–1800, doi:10.1212/wnl.0000000000002585.
12. Helbig, K.L.; Farwell Hagman, K.D.; Shinde, D.N.; Mroske, C.; Powis, Z.; Li, S.; Tang, S.; Helbig, I. Diagnostic exome sequencing provides a molecular diagnosis for a significant proportion of patients with epilepsy. *Genet. Med.* **2016**, *18*, 898–905, doi:10.1038/gim.2015.186.
13. Caporali, C.; Signorini, S.; De Giorgis, V.; Pichiecchio, A.; Zuffardi, O.; Orcesi, S. Early-onset movement disorder as diagnostic marker in genetic syndromes: Three cases of FOXP1-related syndrome. *Eur. J. Paediatr. Neurol.* **2018**, *22*, 336–339, doi:10.1016/j.ejpn.2018.01.007.
14. Bahi-Buisson, N.; Nectoux, J.; Girard, B.; Van Esch, H.; De Ravel, T.; Boddaert, N.; Plouin, P.; Rio, M.; Fichou, Y.; Chelly, J., et al. Revisiting the phenotype associated with FOXP1 mutations: two novel cases of congenital Rett variant. *Neurogenetics* **2010**, *11*, 241–249, doi:10.1007/s10048-009-0220-2.
15. McMahon, K.Q.; Papandreou, A.; Ma, M.; Barry, B.J.; Mirzaa, G.M.; Dobyns, W.B.; Scott, R.H.; Trump, N.; Kurian, M.A.; Paciorkowski, A.R. Familial recurrences of FOXP1-related disorder: Evidence for mosaicism. *Am. J. Med. Genet. A* **2015**, *167a*, 3096–3102, doi:10.1002/ajmg.a.37353.
16. De Bruyn, C.; Vanderhasselt, T.; Tanyalcin, I.; Keymolen, K.; Van Rompaey, K.L.; De Meirleir, L.; Jansen, A.C. Thin genu of the corpus callosum points to mutation in FOXP1 in a child with acquired microcephaly, trigonocephaly, and intellectual developmental disorder: a case report and review of literature. *Eur. J. Paediatr. Neurol.* **2014**, *18*, 420–426, doi:10.1016/j.ejpn.2013.11.010.
17. Ma, M.; Adams, H.R.; Seltzer, L.E.; Dobyns, W.B.; Paciorkowski, A.R. Phenotype Differentiation of FOXP1 and MECP2 Disorders: A New Method for Characterization of Developmental Encephalopathies. *J. Pediatr.* **2016**, *178*, 233–240.e210, doi:10.1016/j.jpeds.2016.08.032.
18. Mencarelli, M.A.; Spanhol-Rosseto, A.; Artuso, R.; Rondinella, D.; De Filippis, R.; Bahi-Buisson, N.; Nectoux, J.; Rubinsztajn, R.; Bienvenu, T.; Moncla, A., et al. Novel FOXP1 mutations associated with the congenital variant of Rett syndrome. *J. Med. Genet.* **2010**, *47*, 49–53, doi:10.1136/jmg.2009.067884.
19. Terrone, G.; Bienvenu, T.; Germanaud, D.; Barthez-Carpentier, M.A.; Diebold, B.; Delanoe, C.; Passemard, S.; Auvin, S. A case of Lennox-Gastaut syndrome in a patient with FOXP1-related disorder. *Epilepsia* **2014**, *55*, e116–e119, doi:10.1111/epi.12800.
20. Olson, H.E.; Tambunan, D.; LaCoursiere, C.; Goldenberg, M.; Pinsky, R.; Martin, E.; Ho, E.; Khwaja, O.; Kaufmann, W.E.; Poduri, A. Mutations in epilepsy and intellectual disability genes in patients with features of Rett syndrome. *Am. J. Med. Genet. A* **2015**, *167a*, 2017–2025, doi:10.1002/ajmg.a.37132.
21. Harada, K.; Yamamoto, M.; Konishi, Y.; Koyano, K.; Takahashi, S.; Namba, M.; Kusaka, T. Hypoplastic hippocampus in atypical Rett syndrome with a novel FOXP1 mutation. *Brain Dev.* **2018**, *40*, 49–52.
22. Van der Aa, N.; Van den Bergh, M.; Ponomarenko, N.; Verstraete, L.; Ceulemans, B.; Storm, K. Analysis of FOXP1 Is Highly Recommended in Male and Female Patients with Rett Syndrome. *Mol Syndr.* **2011**, *1*, 290–293, doi:10.1159/000330755.
23. Meneret, A.; Mignot, C.; An, I.; Habert, M.O.; Jacqueline, A.; Vidailhet, M.; Bienvenu, T.; Roze, E. Generalized dystonia, athetosis, and parkinsonism associated with FOXP1 mutation. *Mov. Disord.* **2012**, *27*, 160–161, doi:10.1002/mds.23956.
24. Takahashi, S.; Matsumoto, N.; Okayama, A.; Suzuki, N.; Araki, A.; Okajima, K.; Tanaka, H.; Miyamoto, A. FOXP1 mutations in Japanese patients with the congenital variant of Rett syndrome. *Clin. Genet.* **2012**, *82*, 569–573, doi:10.1111/j.1399-0004.2011.01819.x.
25. Zhang, Q.; Yang, X.; Wang, J.; Li, J.; Wu, Q.; Wen, Y.; Zhao, Y.; Zhang, X.; Yao, H.; Wu, X., et al. Genomic mosaicism in the pathogenesis and inheritance of a Rett syndrome cohort. *Genet. Med.* **2019**, *21*, 1330–1338, doi:10.1038/s41436-018-0348-2.

26. Le Guen, T.; Fichou, Y.; Nectoux, J.; Bahi-Buisson, N.; Rivier, F.; Boddaert, N.; Diebold, B.; Heron, D.; Chelly, J.; Bienvenu, T. A missense mutation within the fork-head domain of the forkhead box G1 Gene (FOXP1) affects its nuclear localization. *Hum. Mutat.* **2011**, *32*, E2026–E2035, doi:10.1002/humu.21422.
27. Ariani, F.; Hayek, G.; Rondinella, D.; Artuso, R.; Mencarelli, M.A.; Spanhol-Rosseto, A.; Pollazzon, M.; Buoni, S.; Spiga, O.; Ricciardi, S., et al. FOXP1 is responsible for the congenital variant of Rett syndrome. *Am. J. Hum. Genet.* **2008**, *83*, 89–93, doi:10.1016/j.ajhg.2008.05.015.
28. Das, D.K.; Jadhav, V.; Ghattargi, V.C.; Udani, V. Novel mutation in forkhead box G1 (FOXP1) gene in an Indian patient with Rett syndrome. *Gene* **2014**, *538*, 109–112, doi:10.1016/j.gene.2013.12.063.
29. Zhang, Q.; Wang, J.; Li, J.; Bao, X.; Zhao, Y.; Zhang, X.; Wei, L.; Wu, X. Novel FOXP1 mutations in Chinese patients with Rett syndrome or Rett-like mental retardation. *Bmc Med. Genet.* **2017**, *18*, 96, doi:10.1186/s12881-017-0455-y.
30. Diebold, B.; Delepine, C.; Nectoux, J.; Bahi-Buisson, N.; Parent, P.; Bienvenu, T. Somatic mosaicism for a FOXP1 mutation: diagnostic implication. *Clin. Genet.* **2014**, *85*, 589–591, doi:10.1111/cge.12212.
